# Supplementary material for: Detection of clustered circulating tumour cells in early breast cancer
Source: PubMed Central journal article supplement (PMC8257701; doi:10.1038/s41416-021-01327-8), 2021-03-24
Supplement: 41416_2021_1327_MOESM1_ESM.pdf [file 41416_2021_1327_MOESM1_ESM.pdf]

**a**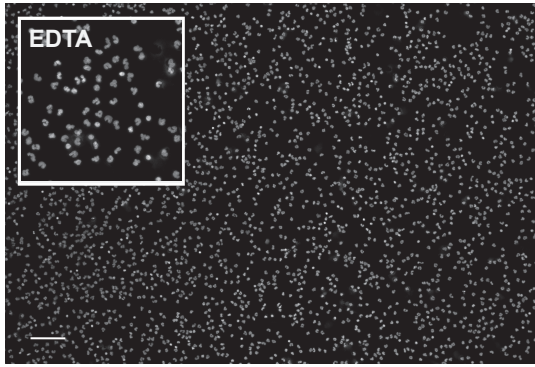**b**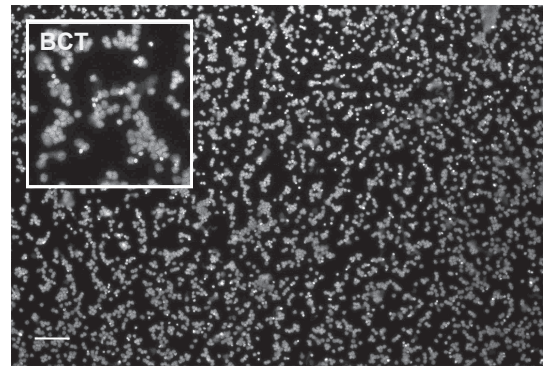

**Supplementary Figure 1.** Effects of blood preservative on white blood cell (WBC) adhesion homogeneity on SBS-CTC slides. **(a)** Representative image of WBC distribution within a SBS-CTC slide for a sample collected in EDTA tubes (scale bar 100 $\mu$ m). We observe no evidence of artificial cluster formation. **(b)** Representative image of WBC distribution within a SBS-CTC slide for a sample collected in BCT tubes (scale bar 100 $\mu$ m). In this case, artificial cluster formation is observed.

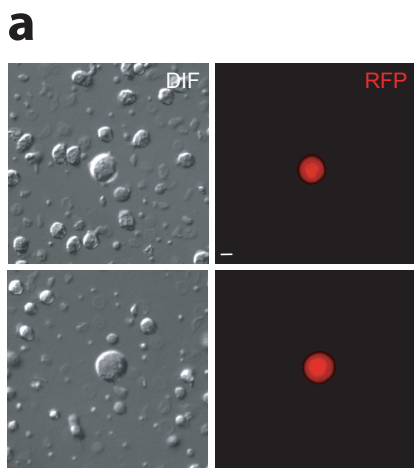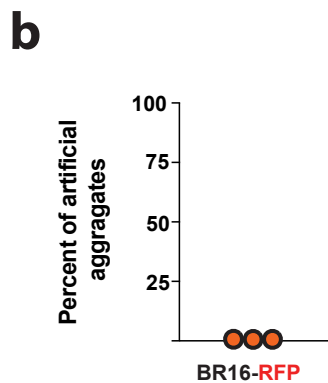

**Supplementary Figure 2.** No evidence of artificial cluster formation. **(a)** Representative images of single BR16-RFP cells captured on the SBS-CTC slide (scale bar 10 $\mu$ m). **(b)** Plot showing percent of artificial aggregates on the SBS-CTC surface upon spiking 50 single BR16-RFP cells in healthy donor blood samples.

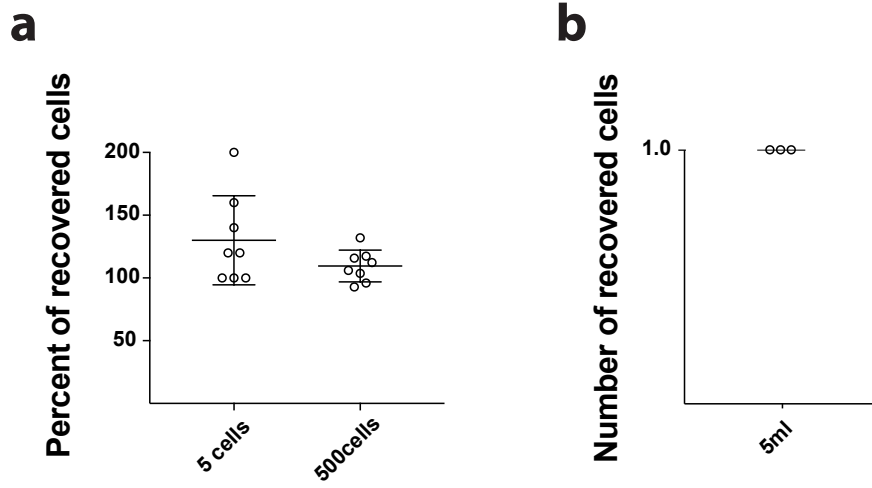

**Supplementary Figure 3.** Reproducibility of the results. (a) The plot shows the percent of recovered cells in multiple instances (n=8) using 5 or 500 BR16-RFP cells spiked in healthy donor blood per each SBS-CTC slide. Error bars represent SD. (b) The plot shows the number of recovered cells when spiking 1 BR16-RFP cell in 5ml of healthy donor blood (n=3).

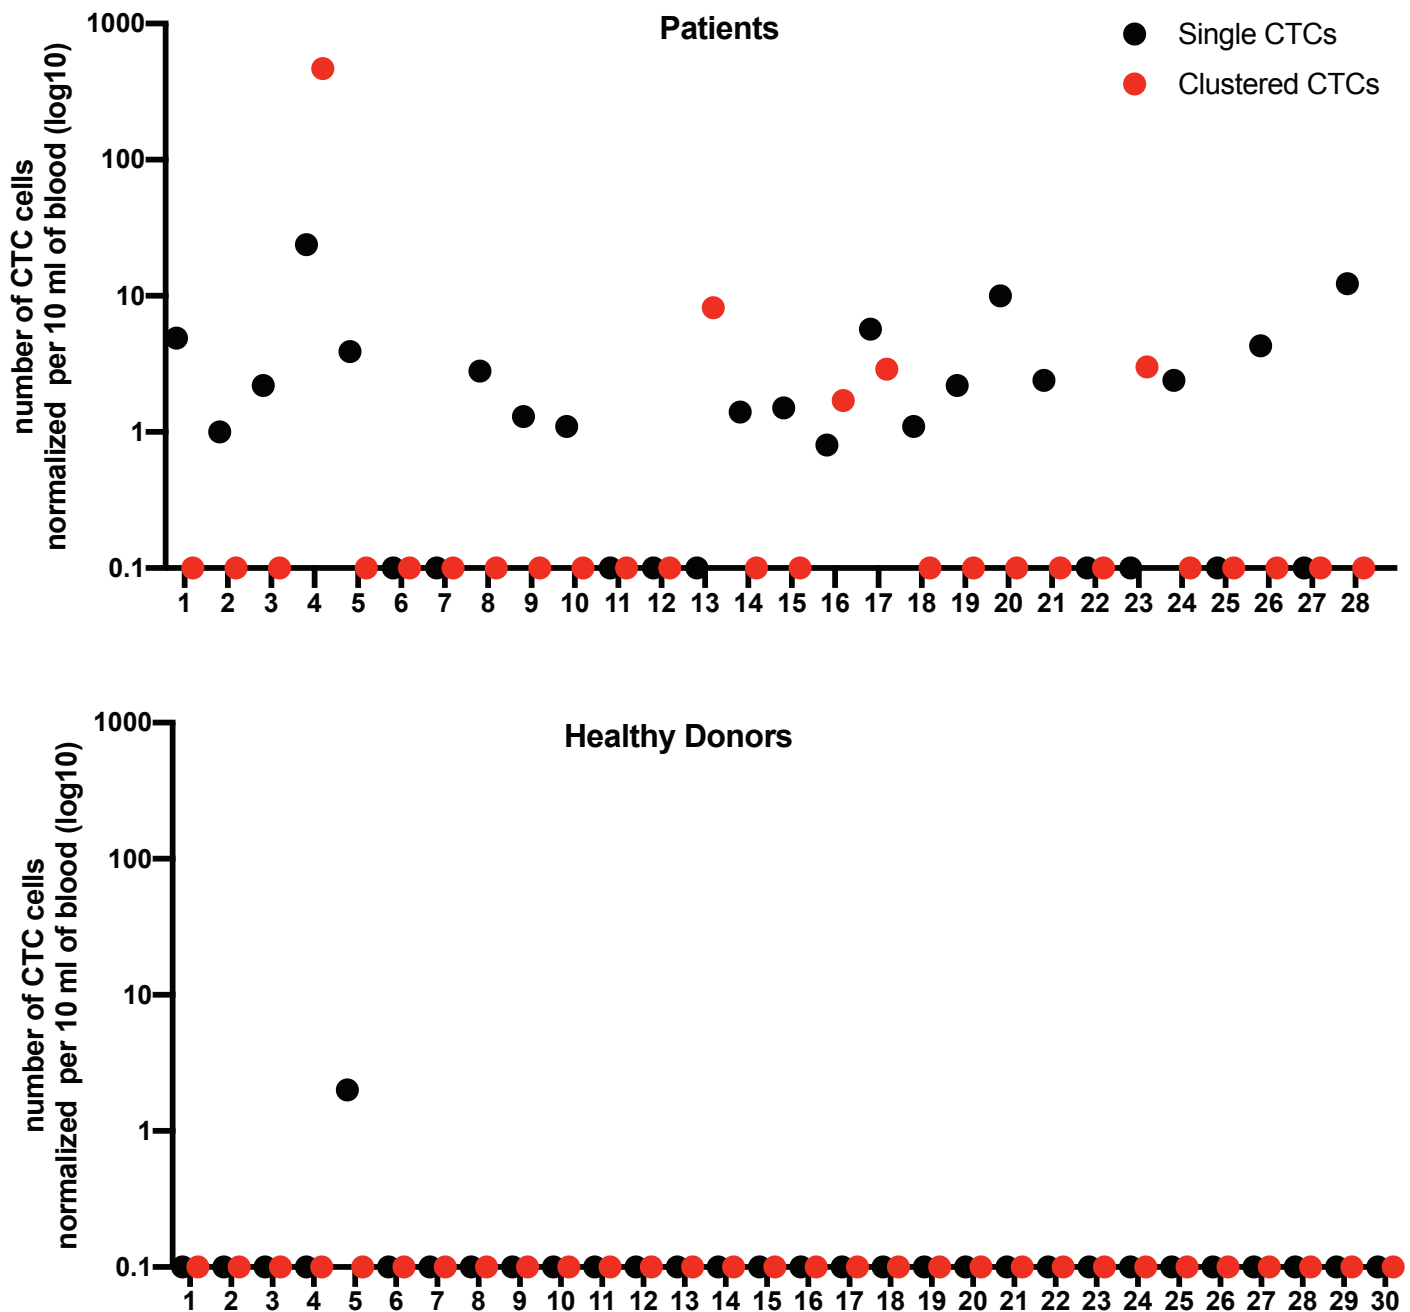

**Supplementary Figure 4.** Number of detected CTCs in each sample. The plots show normalized (per 10 ml blood volume) number of detected single (*black*) and clustered (*red*) circulating tumour cells in breast cancer patients (*top*) and healthy donors (*bottom*). Values for clustered CTCs are displayed considering the number of cells in clusters.

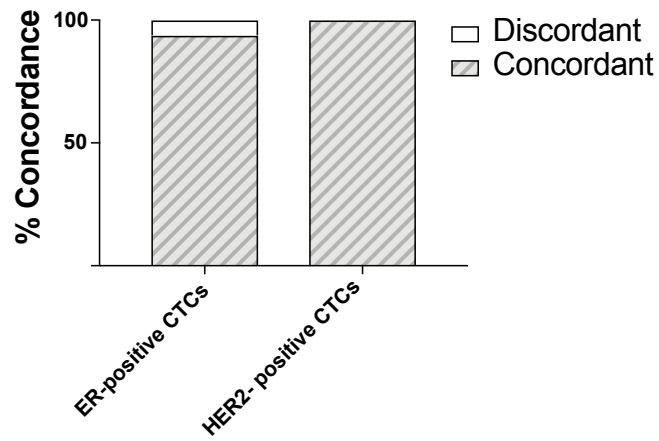

**Supplementary Figure 5.** Concordance between CTC marker positivity and primary tumour. The plot shows the percent of CTCs in which marker status (ER and HER2) is concordant with that of the primary tumour.

## White blood Cells

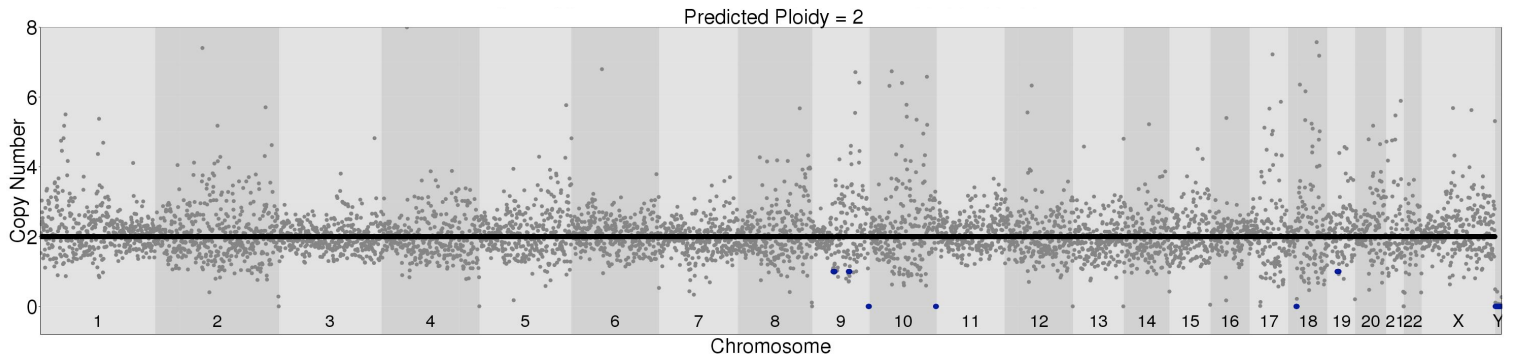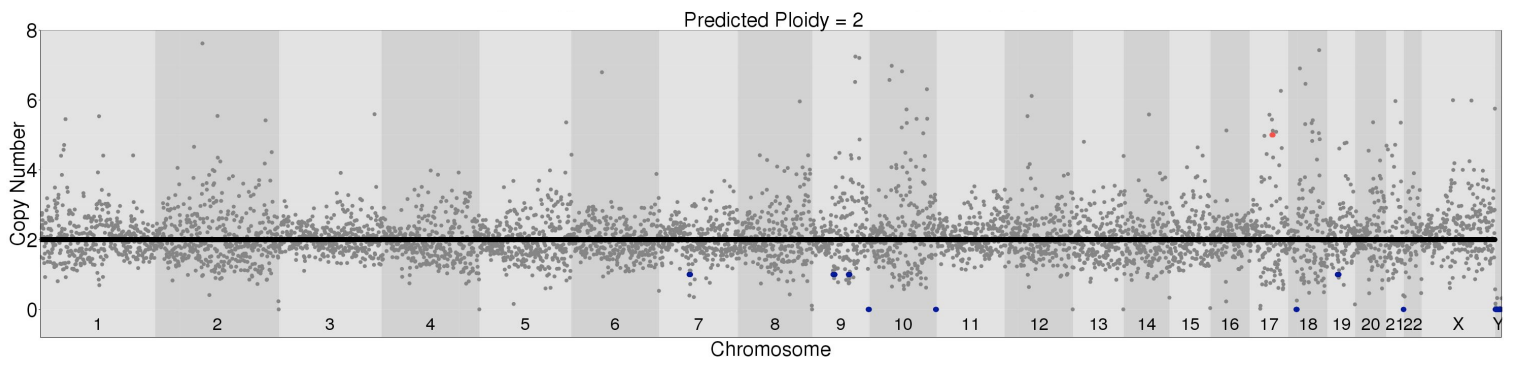

## CTC clusters

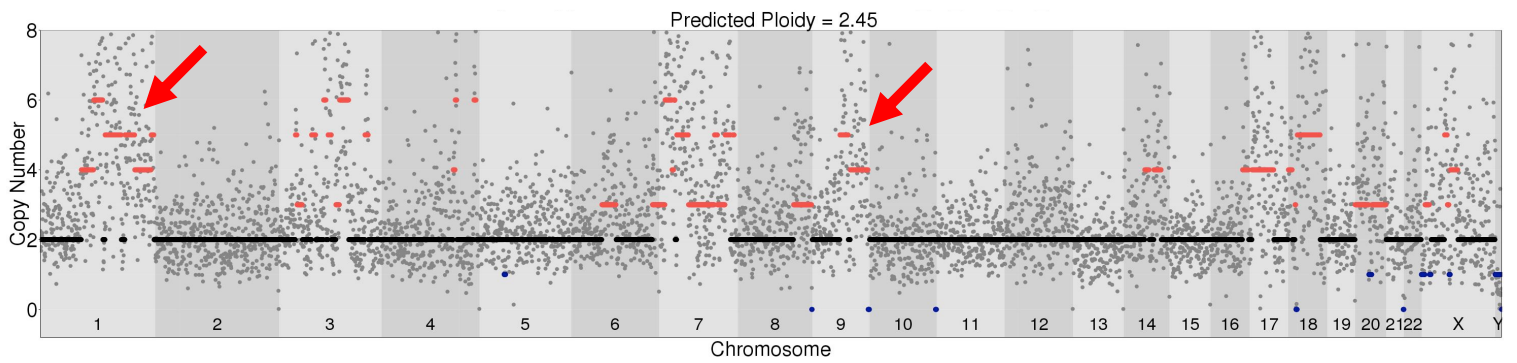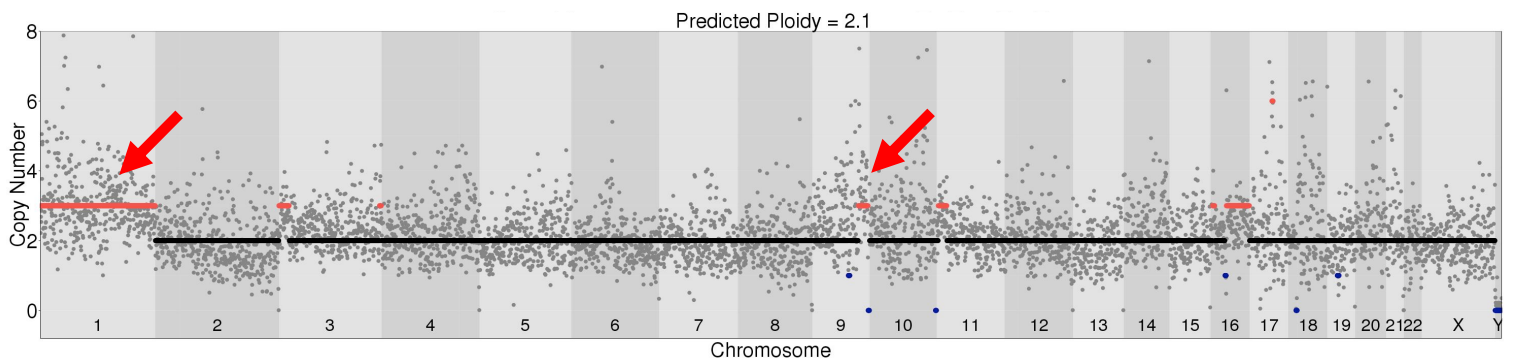

**Supplementary Figure 6.** Copy number profiles of white blood cell controls and CTC clusters. In particular, both CTC clusters are isolated from the same patient (ID #4), and display commonalities in the copy number profile, i.e. amplification of parts of Chromosome 1 and 9 (red arrows), alongside with additional changes that are specific to each cluster. In contrast, white blood cells present a normal (diploid) copy number profile.

| Pat. ID | Age | Meno-pausal status | ER   | PR     | HER2 | Ki-67 | Initial AJCC Stage 7 <sup>th</sup> edition | Subtype | Neo-adjuvant treatment                  | Pre-Op. TNM | Postoperative TNM                    | pCR                                                           | Number of CK-positive CTC clusters                                                                                                                                                                                             | Number of CK-ER-positive CTC clusters | Number of CK-positive HER2-amplified CTC clusters | Number of CK-ER-positive single CTCs | Number of CK-positive HER2-amplified single CTCs |
|---------|-----|--------------------|------|--------|------|-------|--------------------------------------------|---------|-----------------------------------------|-------------|--------------------------------------|---------------------------------------------------------------|--------------------------------------------------------------------------------------------------------------------------------------------------------------------------------------------------------------------------------|---------------------------------------|---------------------------------------------------|--------------------------------------|--------------------------------------------------|
| 1       | 76  | post               | 100% | 80%    | neg. | 5%    | IA                                         | lumA    | no                                      | -           | pT1c pN0 (0/1)cM0 G1 V0 L0 Pn0 R0    | -                                                             | 0                                                                                                                                                                                                                              | 0                                     | 0                                                 | 4                                    | 0                                                |
| 2       | 80  | post               | 100% | 100%   | neg. | 5%    | IA                                         | lumA    | no                                      | -           | pT1c pN0 (0/1)cM0 G2 V0 Pn0 L1 R0    | -                                                             | 0                                                                                                                                                                                                                              | 0                                     | 0                                                 | 1                                    | 0                                                |
| 3       | 83  | post               | 95%  | 80%    | neg. | 15%   | IA                                         | lumA    | no                                      | -           | pT1b pN0 (0/1)cM0 G1 L0 V0 Pn0 R0    | -                                                             | 0                                                                                                                                                                                                                              | 0                                     | 0                                                 | 2                                    | 0                                                |
| 4       | 55  | post               | 100% | 80%    | neg. | 10%   | IA                                         | lumA    | no                                      | -           | pT1c pN0 (0/2)cM0 G1 V0 L0 Pn1 R0    | -                                                             | 4 cluster (2cells),<br>9cluster (3cells),<br>4cluster (4cells),<br>3cluster (5cells),<br>4cluster (6cells),<br>1cluster (13cells),<br>1cluster (15cells),<br>1cluster (33cells),<br>1cluster (35cells),<br>1cluster (>50cells) | 0                                     | 0                                                 | 12                                   | 0                                                |
| 5       | 76  | post               | 100% | 100%   | neg. | 5-10% | IA                                         | lumA    | no                                      | -           | pT1c pN0 (0/3)cM0 G1 L0 V0 Pn0 R0    | -                                                             | 0                                                                                                                                                                                                                              | 0                                     | 0                                                 | 2                                    | 0                                                |
| 6       | 56  | post               | 90%  | 100%   | neg. | 5%    | IIA                                        | lumA    | no                                      | -           | pT2 pN0 (0/2)cM0 G1 V0 L0 Pn0 R0     | -                                                             | 0                                                                                                                                                                                                                              | 0                                     | 0                                                 | 0                                    | 0                                                |
| 7       | 46  | pre                | 90%  | 90%    | neg. | 5-10% | IIA                                        | lumA    | no                                      | -           | pT1c pN1 (3/11)iM0 G2 V0 L1 Pn1 R0   | -                                                             | 0                                                                                                                                                                                                                              | 0                                     | 0                                                 | 0                                    | 0                                                |
| 8       | 83  | post               | 80%  | 80%    | neg. | 5%    | IIA                                        | lumA    | Letrozol for 2 month                    | cT3c N0c M0 | ypT2 ypN0 (0/3)cM0 G1 V0 L0 Pn0 R0   | no                                                            | 0                                                                                                                                                                                                                              | 0                                     | 0                                                 | 1                                    | 0                                                |
| 9       | 71  | post               | 100% | 90%    | neg. | 20%   | IIIA                                       | lumB    | no                                      | -           | rpT1c pN2a (4/17)iM0 G2 L0 V0 Pn0 R0 | -                                                             | 0                                                                                                                                                                                                                              | 0                                     | 0                                                 | 0                                    | 1                                                |
| 10      | 85  | post               | 60%  | 50%    | neg. | 25%   | IIB                                        | lumB    | Letrozol for 20 months                  | cT2c Noc M0 | ypT2a pN1mi(1/3)iM0 G2 V0 Pn0 L1 R0  | no                                                            | 0                                                                                                                                                                                                                              | 0                                     | 0                                                 | 1                                    | 0                                                |
| 11      | 65  | post               | 95%  | 30-40% | neg. | 70%   | IIB                                        | lumB    | Epirubicin<br>Cyclo-phosphamid<br>Taxol | cT2c N1c M0 | ypTis ypN0 (0/4)cM0 G3 V0 L0 Pn0 R0  | no,<br>residual DCIS,<br>no cancer<br>(Regression after Sinn: | 0                                                                                                                                                                                                                              | 0                                     | 0                                                 | 0                                    | 0                                                |

|    |    |                          |      |     |      |                  |                             |                |                                                                   |                   |                                     |     |                       |                       |                        |   |   |  |
|----|----|--------------------------|------|-----|------|------------------|-----------------------------|----------------|-------------------------------------------------------------------|-------------------|-------------------------------------|-----|-----------------------|-----------------------|------------------------|---|---|--|
|    |    |                          |      |     |      |                  |                             |                |                                                                   |                   |                                     | 3)  |                       |                       |                        |   |   |  |
| 12 | 87 | post                     | 90%  | 10% | neg. | 30%              | IIA                         | lumB           | no                                                                | -                 | pT2 cN0 cM0 G2 L0 V0Pn0 R0          | -   | 0                     | 0                     | 0                      | 0 | 0 |  |
| 13 | 84 | post                     | 90%  | 10% | neg. | 20%              | IA                          | lumB           | no                                                                | -                 | pT1a pN0 (0/1)cM0 G2 V0 L1 Pn0 R0   | -   | 0                     | 1 cluster<br>(4cells) | 0                      | 0 | 0 |  |
| 14 | 74 | post                     | 100% | 10% | neg. | 40%              | IIA                         | lumB           | no                                                                | -                 | pT2 pN0 (0/6)cM0 G3 L1 V0 Pn1 R0    | -   | 0                     | 0                     | 0                      | 1 | 0 |  |
| 15 | 54 | post                     | 100% | 10% | neg. | 15%              | IIA                         | lumB           | no                                                                | -                 | pT1c pN1a(1/16)iM0 G2 L1 V0 Pn0 R0  | -   | 0                     | 0                     | 0                      | 1 | 0 |  |
| 16 | 73 | post                     | 100% | 90% | neg. | 35%              | IIA                         | lumB           | no                                                                | -                 | pT2(m) pN0 (0/3)cM0 G2 L1 V0 Pn1 R0 | -   | 1 cluster<br>(2cells) | 0                     | 0                      | 1 | 0 |  |
| 17 | 63 | post                     | 100% | 20% | neg. | 20%              | IA                          | lumB           | no                                                                | -                 | pT1c pN1mi (1/2)cM0 G1V0 L0 Pn0 R0  | -   | 1 cluster<br>(2cells) | 0                     | 0                      | 4 | 0 |  |
| 18 | 81 | post                     | 100% | 1%  | neg. | 10%              | IA                          | lumB           | no                                                                | -                 | pT1 pN0 (0/1)cM0 L0 V0 R0           | -   | 0                     | 0                     | 0                      | 1 | 0 |  |
| 19 | 33 | pre                      | 95%  | 95% | neg. | 20%              | IIIA                        | lumB           | no                                                                | -                 | pT3 pN2a (8/22)iM0 G2 L1 V0 Pn0 R0  | -   | 0                     | 0                     | 0                      | 1 | 0 |  |
| 20 | 54 | post                     | 90%  | 5%  | neg. | 30%              | IA                          | lumB           | no                                                                | -                 | pT1b pN0 (0/1)cM0 G2 V0 L0 Pn0 R0   | -   | 0                     | 0                     | 0                      | 4 | 0 |  |
| 21 | 50 | pre                      | 50%  | 60% | neg. | 60%              | recurrent<br>tumor          | lumB           | no                                                                | -                 | rpN1a(2/2) Pn1                      | -   | 0                     | 0                     | 0                      | 1 | 0 |  |
| 22 | 80 | post                     | 90%  | 5%  | pos. | 20%              | IA                          | HER2           | no                                                                | -                 | pT1b pN0 (0/2)cM0 G2 V0 Pn0 L0 R0   | -   | 0                     | 0                     | 0                      | 0 | 0 |  |
| 23 | 55 | post                     | 0%   | 0%  | pos. | 70%              | IIA                         | HER2           | Docetaxel<br>Carboplatin<br>Herceptin<br>Pertuzumab               | ct2c<br>N0c<br>M0 | ypT1a ypN0 (0/6)iM0 G3 L0 V0 pN0 R0 | no  | 0                     | 0                     | 1 cluster<br>(2 cells) | 0 | 0 |  |
| 24 | 85 | post                     | 0%   | 0%  | pos. | 25%              | IIB                         | HER2           | Taxol<br>Herceptin<br>Pertuzumab                                  | ct2c<br>N1c<br>M0 | ypT0 ypN0 (0/6)cM0 L0 V0 Pn0 R0     | yes | 0                     | 0                     | 0                      | 1 | 1 |  |
| 25 | 66 | post                     | 0%   | 0%  | neg. | 50%              | IA                          | Triple<br>neg. | no                                                                | -                 | pT1c pN1a (2/3)iM0 G3 L0 V0 Pn0 R0  | -   | 0                     | 0                     | 0                      | 0 | 0 |  |
| 26 | 42 | pre                      | 0%   | 0%  | neg. | 75%              | IIB                         | Triple<br>neg. | Adriablastin<br>Cyclo-<br>phosphamid<br>Paclitaxel<br>Carboplatin | ct2c<br>N1c<br>M0 | ypT0 ypN0 (0/4)iM0 G3 V0 L0 Pn0 R0  | yes | 0                     | 0                     | 0                      | 4 | 0 |  |
| 27 | 78 | post                     | 0%   | 0%  | neg. | 50%              | IIA                         | Triple<br>neg. | Carboplatin<br>Paclitaxel                                         | ct2c<br>N0c<br>M0 | ypT0 ypN0(0/1)iM0 G3 L0 V0 Pn0 R0   | yes | 0                     | 0                     | 0                      | 0 | 0 |  |
| 28 | 36 | post<br>(GnRH,<br>Chemo) | 0%   | 0%  | neg. | not<br>available | axillary<br>Re-<br>currence | Triple<br>neg. | no                                                                | -                 | rpN2a (8/16)cM0 G3                  | -   | 0                     | 0                     | 0                      | 7 | 0 |  |



**Supplementary Table 1. Clinical features of enrolled patients and features of detected CTCs.** For each patient, the table shows patient identification number (ID), age, menopausal status, ER, PR, HER2 and Ki-67 status of the primary tumor, initial AJCC Stage, Subtype: lumA= luminal A-like, lumB= luminal-B like, HER2, triple negative, whether and how the patient was treated neoadjuvantly, pre-and post TNM, Abbreviation: L=Lymphatic invasion, V= Vascular invasion, Pn=Perineural invasion, pCR, Number of detected pan-cytokeratin (CK)-positive CTC clusters, the number of detected CK- and estrogen receptor (ER)-positive CTC clusters, the number of detected CK-positive and HER2-amplified CTC clusters, the number of detected CK- and ER-positive single CTCs and the number of detected CK- and HER2-amplified single CTCs.

| Disease Condition                    | n         | $\geq 1$ CTC detected by SBS: n (%) |
|--------------------------------------|-----------|-------------------------------------|
| <b>Breast Cancer Patients Cohort</b> | <b>28</b> | <b>21 (75)</b>                      |
| Luminal-like Breast cancer patients  | 21        | 17 (81)                             |
| <b>Healthy Donors Cohort</b>         | <b>30</b> | <b>1 (3.3)</b>                      |

**Supplementary Table 2. CTC detection rates in breast cancer patients and healthy donors.** The table shows disease condition, number of samples (n) and number of patients in whom at least 1 CTC was detected with the SBS-CTC technology. The corresponding percentage of patients that resulted CTC-positive is shown in brackets.
